# Supplementary material
Source: HighWire-hosted journal article supplement (https://ard.bmj.com/content/78/7/e65)
Supplement: inline-supplementary-material-1 [file inline-supplementary-material-1.docx]

**Supplementary Table 1.** Levels of complement factors of IgG4-RD patients and healthy donors

| **Complement factor** | **IgG4-RD patients** | **Healthy donors** | **P-value** |
| --- | --- | --- | --- |
| C1q, ng/mL | 96,190 (83,417–106,556) | 96,194 (86,873–110,666) | 0.5388 |
| C2, ng/mL | 33,998 (16,695–69,714) | 29,796 (15,295–78,611) | 0.8185 |
| C3, ng/mL | 724,873 (319,001–1,133,200) | 806,073 (400,733–1,499,650) | 0.1727 |
| C3b/iC3b, ng/mL | 11,686,000 (6,433,800–16,829,500) | 13,178,000 (10,696,500–18,486,750) | 0.1493 |
| C4, ng/mL | 219,671 (135,228–369,536) | 325,596 (256,138–382,530) | 0.0140 |
| C4b, ng/mL | 8,784 (2,970–16,600) | 16,285 (7,065–30,031) | 0.0101 |
| C5, ng/mL | 33347 (31214–42253) | 30,375 (27,171–34,120) | 0.0293 |
| C5a, pg/mL | 16,417 (13,121–22,190) | 7,083 (4,734–9,515) | <.0001 |
| C9, ng/mL | 6,325 (5,496–7,771) | 6,766 (5,045–8,870) | 0.7000 |
| Factor D, ng/mL | 4,569 (3,739–5,425) | 5,482 (4,777–6,806) | 0.0209 |
| Factor I, ng/mL | 29,229 (19,938–40,140) | 28,975 (19,725–33,313) | 0.3336 |
| MBL, ng/mL | 5,357 (1,375–8,952) | 4,635 (1,402–7,287) | 0.4315 |
| Factor B, ng/mL | 164,980 (131,182–209,159) | 212,153 (149,736–265,692) | 0.0768 |
| Factor H, ng/mL | 280,223 (235,496–310,916) | 239,276 (202,940–315,387) | 0.0781 |
| Properdin, ng/mL | 26,467 (23,145–30,267) | 27,259 (25,156–31,036) | 0.3419 |

IgG4-RD: IgG4-related disease, MBL: mannose binding lectin.
